# Supplementary material for: Expression and role of lumican in acute aortic dissection: A human and mouse study
Source: PubMed Central journal article supplement (PMC8312931; doi:10.1371/journal.pone.0255238), 2021-07-26

Fig. 6A

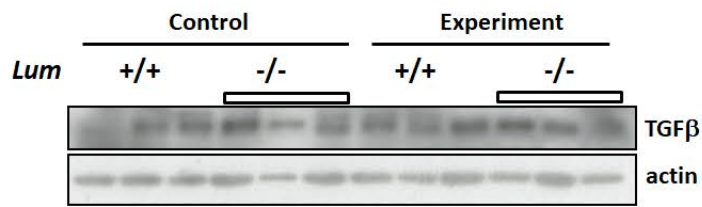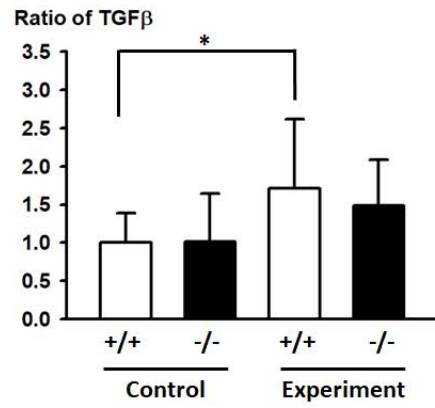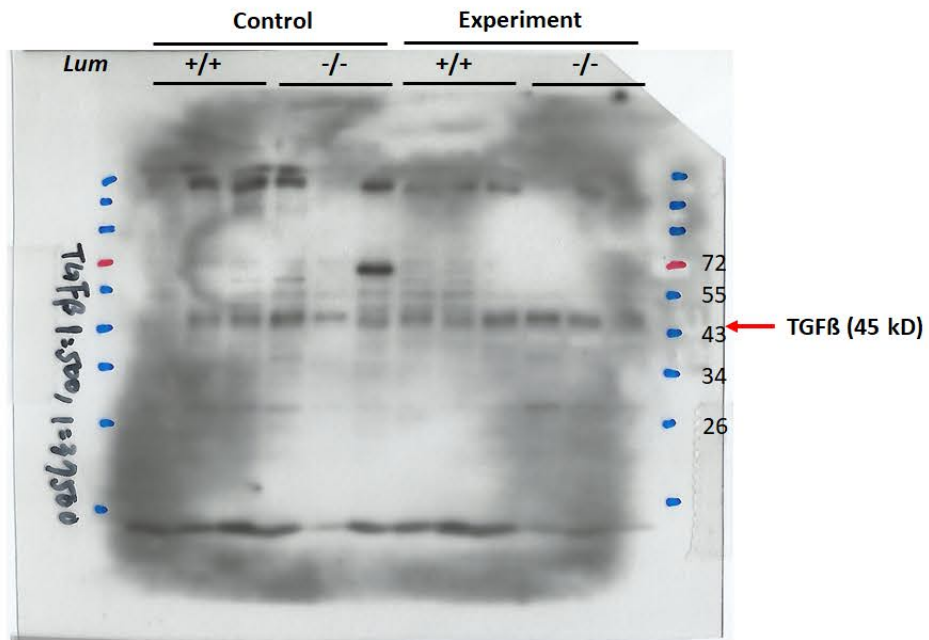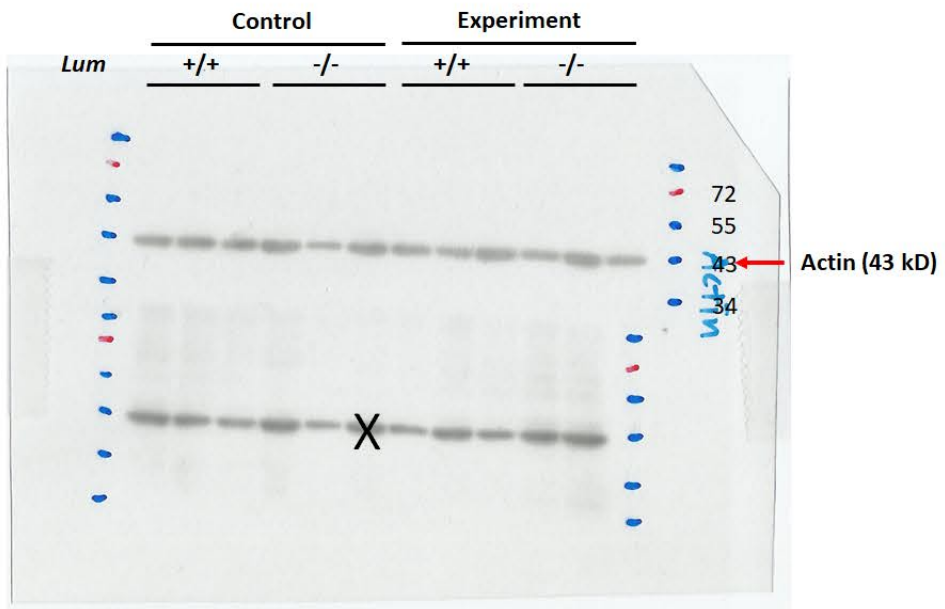

Fig. 6B

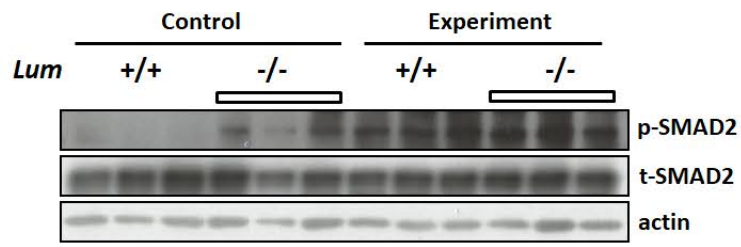

Ratio of p-SMAD2

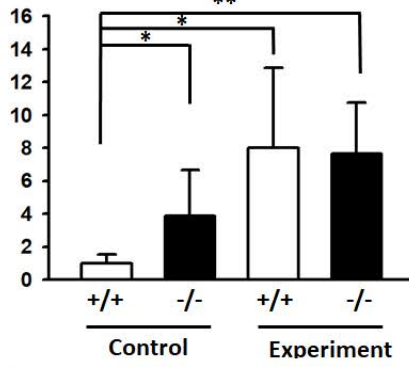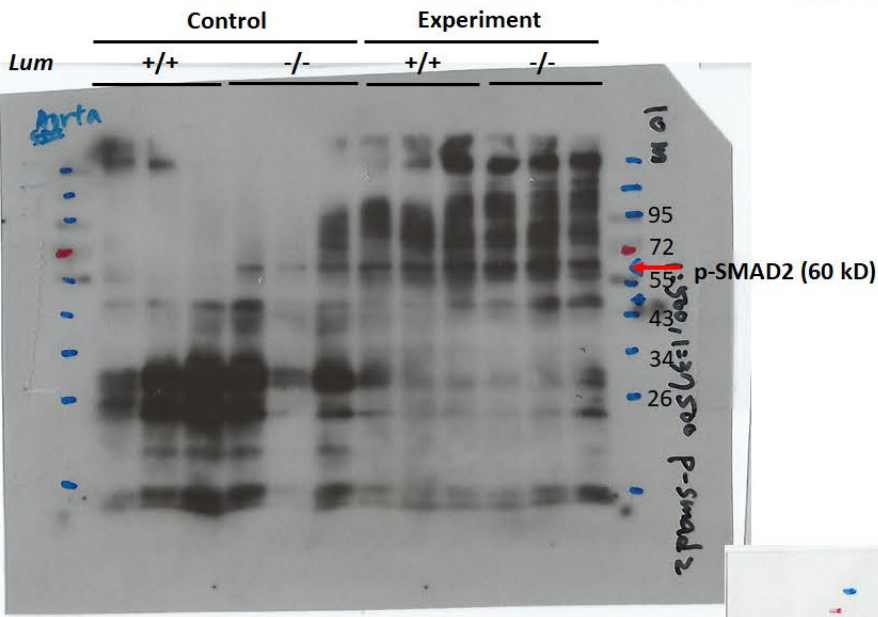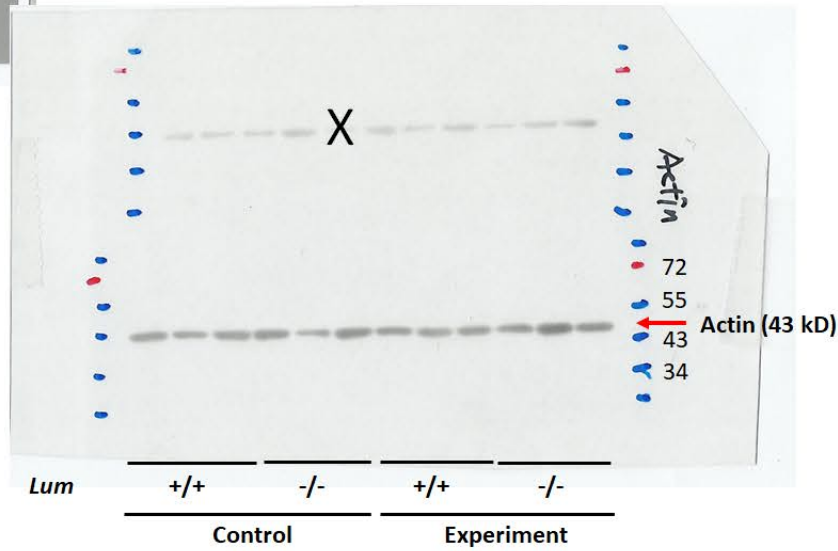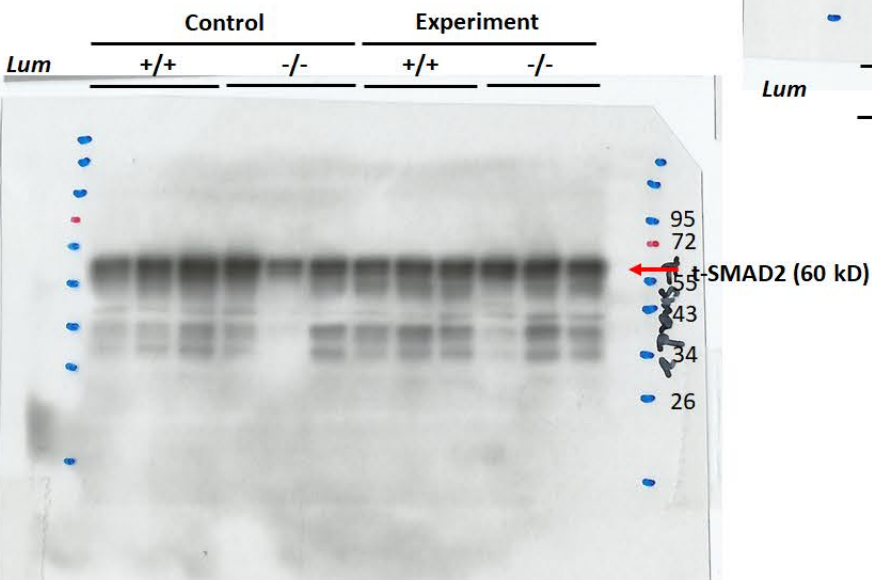

Fig. 6C

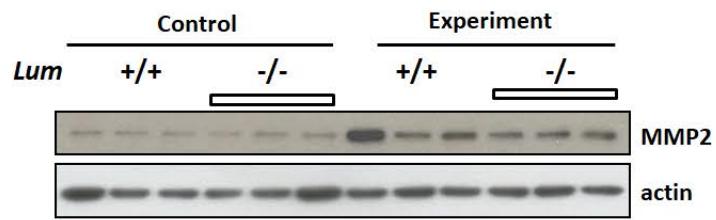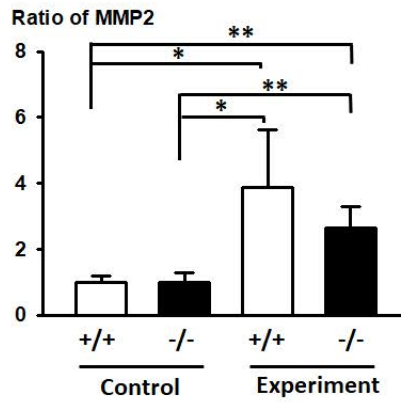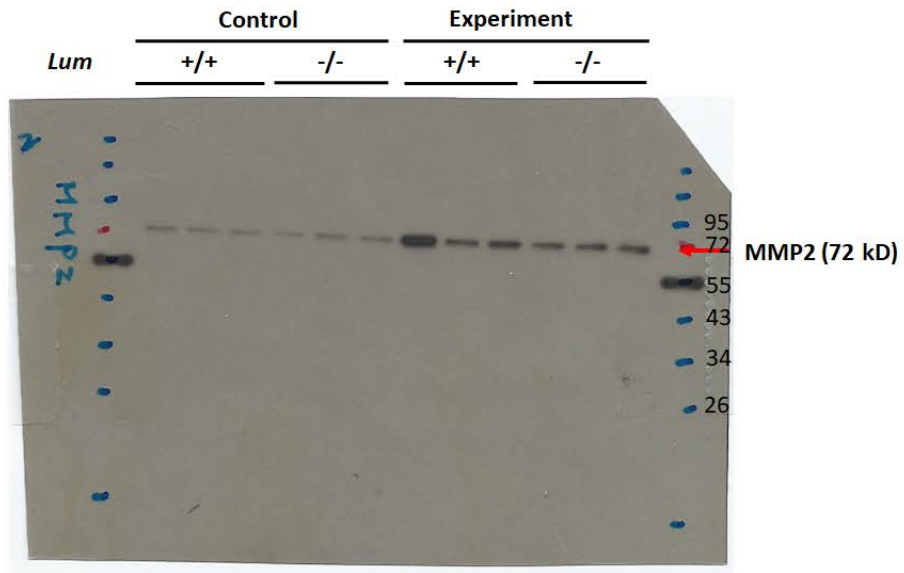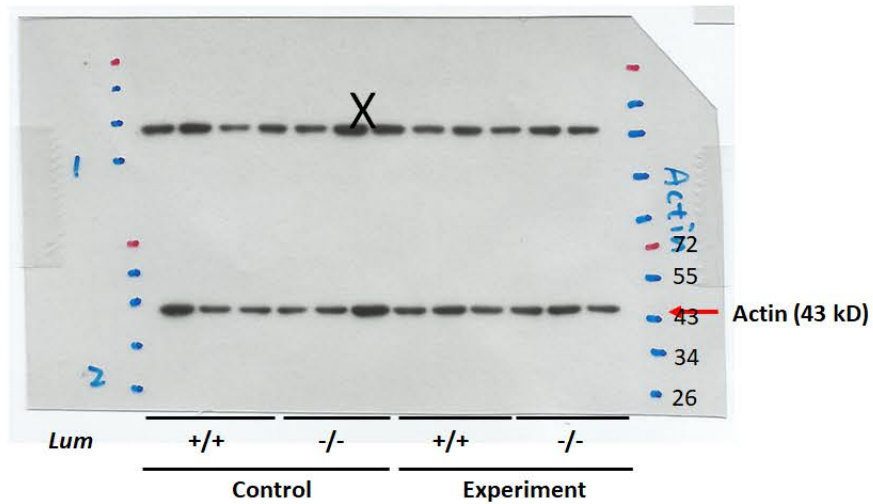

Fig. 6D

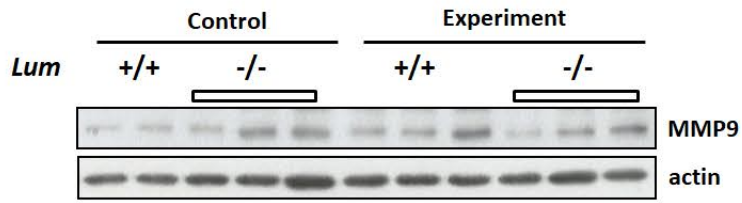

Ratio of MMP9

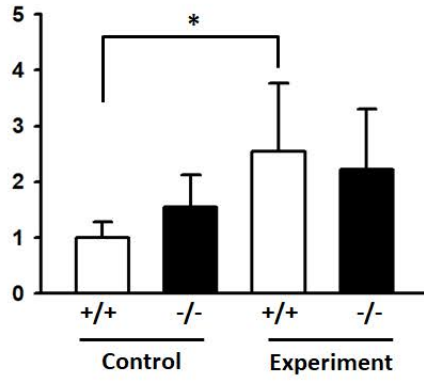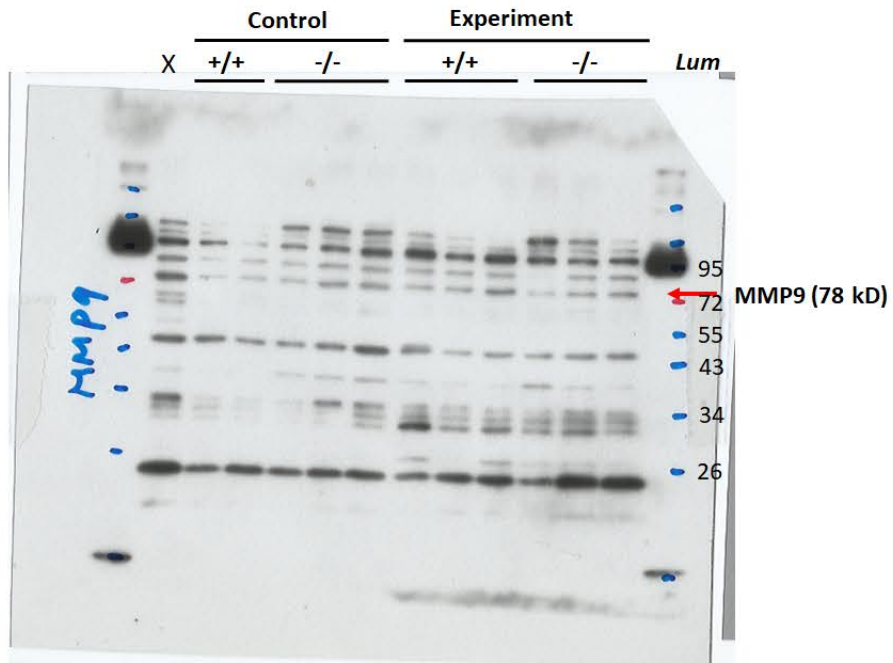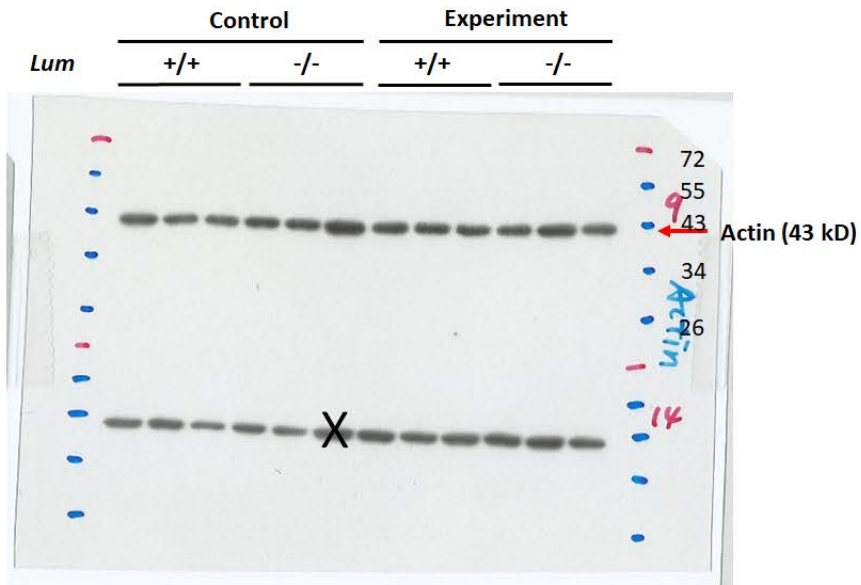

Fig. 6E

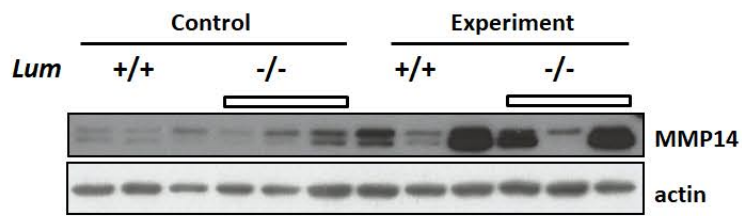

Ratio of MMP14

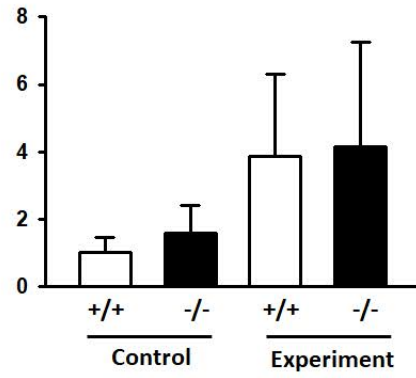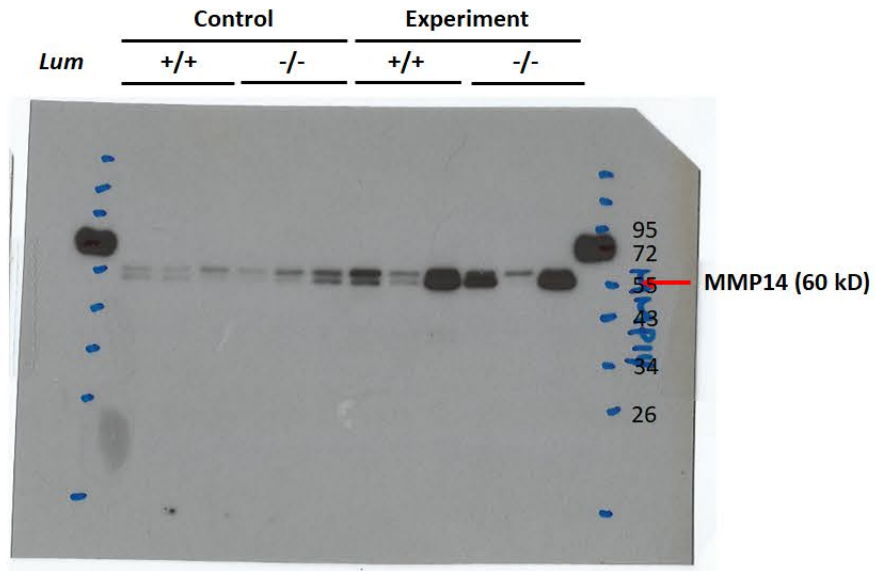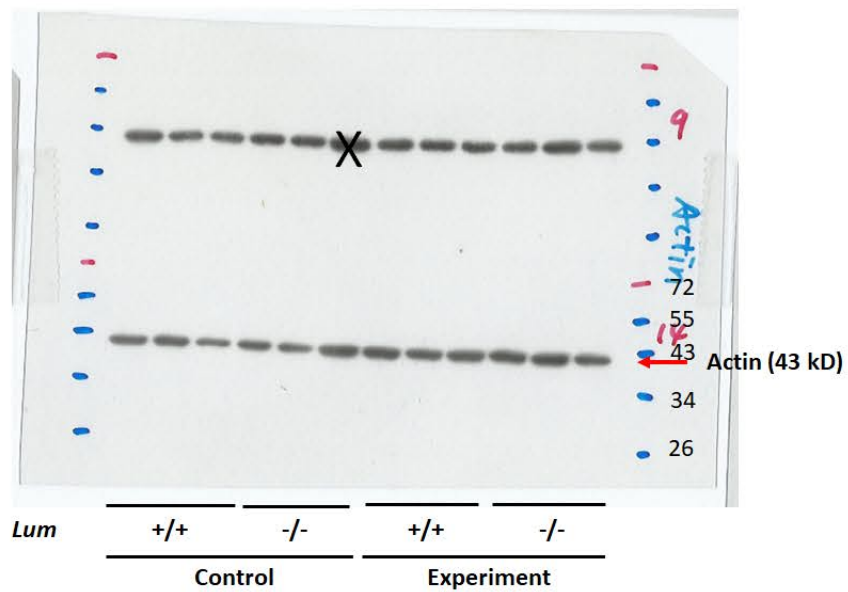

Fig. 6F

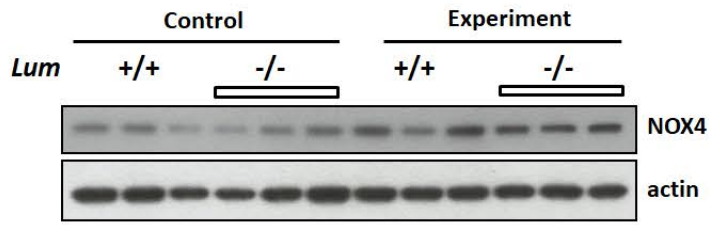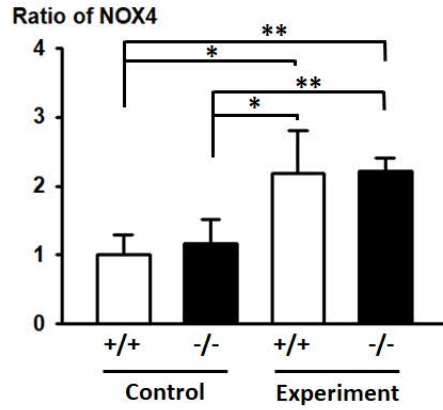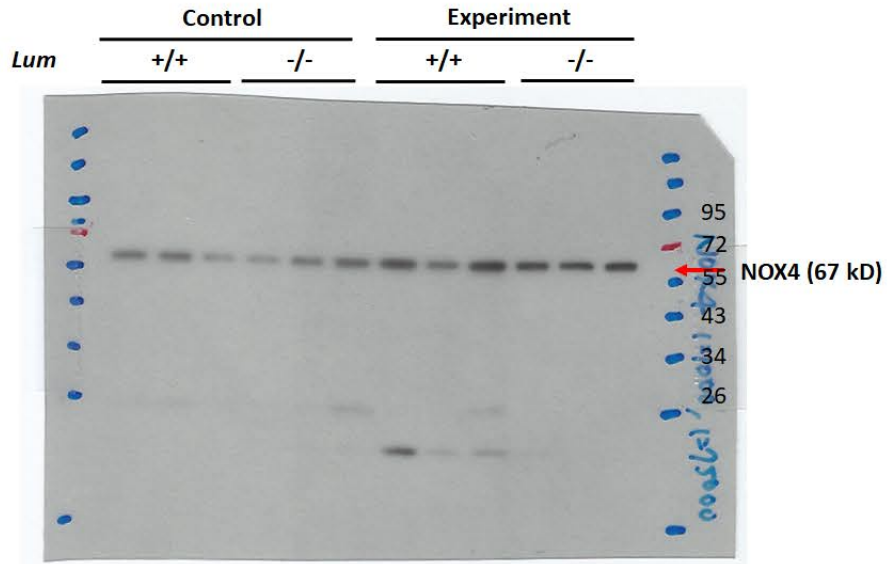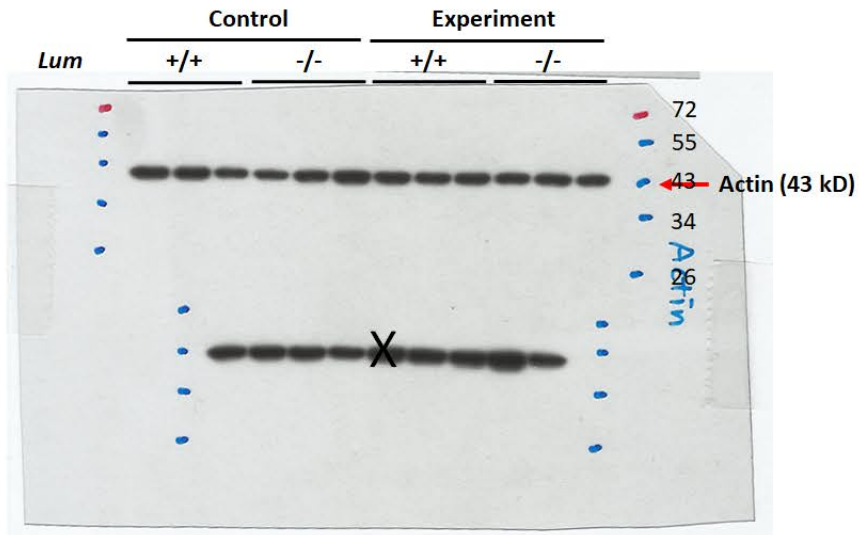

Fig. 7

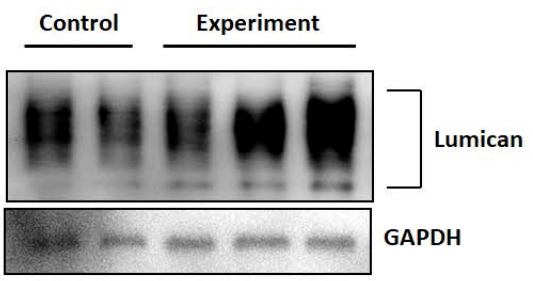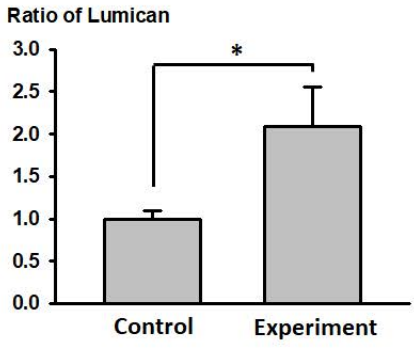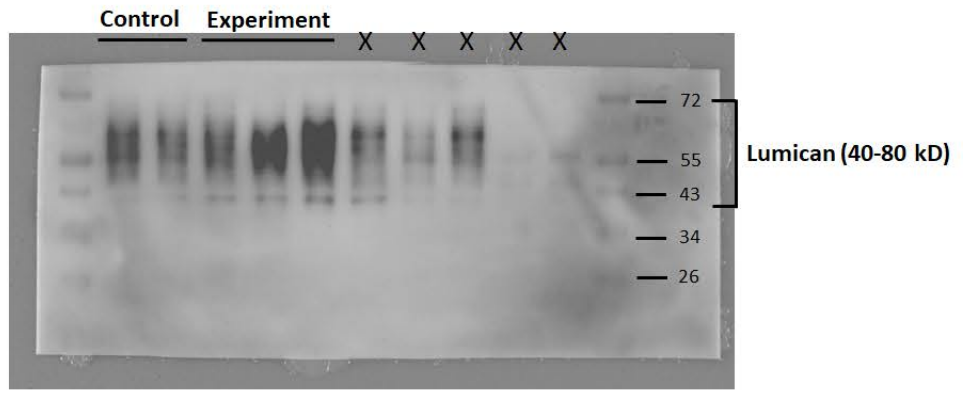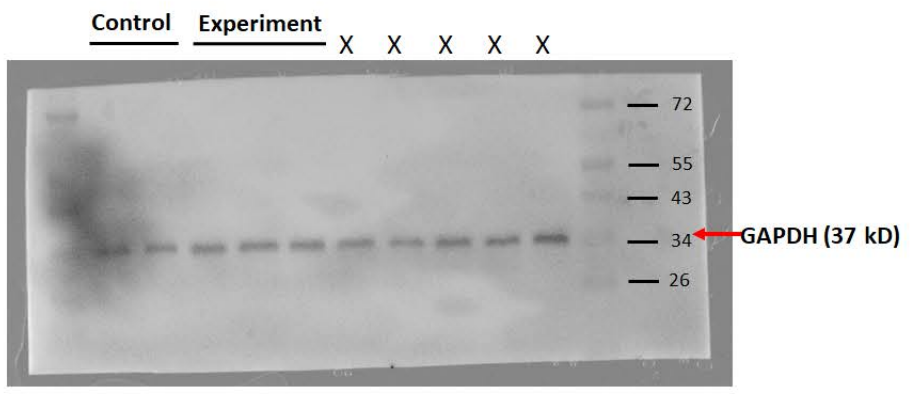

Supplement: pone.0255238.s002.pdf [file pone.0255238.s002.pdf]
